# Supplementary material for: Photophysical properties of 4-(5-methylthiophen-2-yl)pyridinium–cyclic enolate betaine dyes tuned by control of twisted intramolecular transfer
Source: Royal Society of Chemistry journal article supplement (doi:10.1039/d1nj00714a), 2021-01-01
Supplement: d1nj00714a1.pdf [file d1nj00714a1.pdf]

## Electronic Supplementary information

### Photophysical properties of 4-4-(5-methylthiophen-2-yl)pyridinium–cyclic enolate betaine dyes tuned by control of twisted intramolecular transfer

Yuichiro Hayashi,<sup>a</sup> Naoya Suzuki,<sup>\*a</sup> Takeshi Maeda,<sup>a</sup> Hideki Fujiwara<sup>b</sup> and Shigeyuki Yagi<sup>\*a</sup>

<sup>a</sup>Department of Applied Chemistry, Graduate School of Engineering, Osaka Prefecture University,  
1-1 Gakuen-cho, Naka-ku, Sakai, Osaka 599-8531, Japan

<sup>b</sup>Department of Chemistry, Graduate School of Science, Osaka Prefecture University,  
1-1 Gakuen-cho, Naka-ku, Sakai, Osaka 599-8531, Japan

Corresponding author: Prof. Dr. Shigeyuki Yagi

TEL: +81-72-254-9320 FAX: +81-72-254-9910

E-mail: [yagi@chem.osakafu-u.ac.jp](mailto:yagi@chem.osakafu-u.ac.jp)

## Contents

|                                                                                        |    |
|----------------------------------------------------------------------------------------|----|
| <b>Table S1.</b> Crystal data and structure refinement for <b>TPB-4</b>                | 2  |
| <b>Table S2.</b> Photophysical properties of <b>TPB-1–4</b> in different solvents      | 3  |
| <b>Fig. S1.</b> Electronic absorption spectra of <b>TPB-1–4</b> in different solvents. | 4  |
| <b>Fig. S2.</b> Fluorescence spectra of <b>TPB-1–4</b> in different solvents.          | 5  |
| <b>Fig. S3.</b> Lippert-Mataga plots for <b>TPB-1–4</b> .                              | 6  |
| <b>Fig. S4.</b> Electronic absorption spectra of <b>TPB-1–4</b> in PMMA doped film.    | 6  |
| <b>Fig. S5.</b> $^1\text{H}$ and $^{13}\text{C}$ NMR spectra of <b>TPB-1</b> .         | 7  |
| <b>Fig. S6.</b> $^1\text{H}$ and $^{13}\text{C}$ NMR spectra of <b>TPB-2</b> .         | 8  |
| <b>Fig. S7.</b> $^1\text{H}$ and $^{13}\text{C}$ NMR spectra of <b>TPB-3</b> .         | 9  |
| <b>Fig. S8.</b> $^1\text{H}$ and $^{13}\text{C}$ NMR spectra of <b>TPB-4</b> .         | 10 |
| <b>Fig. S9.</b> $^{19}\text{F}$ NMR spectra of <b>TPB-4</b> .                          | 11 |
| <b>Fig. S10.</b> $^1\text{H}$ and $^{13}\text{C}$ NMR spectra of <b>TP-Me</b> .        | 12 |

**Table S1.** Crystal data and structure refinement for **TPB-4**

|                                                     | <b>TPB-4</b>                                                                  |
|-----------------------------------------------------|-------------------------------------------------------------------------------|
| Formula                                             | C <sub>20</sub> H <sub>9</sub> F <sub>5</sub> N <sub>2</sub> O <sub>3</sub> S |
| Formula weight                                      | 452.35                                                                        |
| Crystal system                                      | monoclinic                                                                    |
| Space group                                         | P2 <sub>1</sub> /c (#14)                                                      |
| Lattice Parameters <i>a</i> /Å                      | 15.9055(9)                                                                    |
| <i>b</i> /Å                                         | 7.1059(4)                                                                     |
| <i>c</i> /Å                                         | 16.6403(11)                                                                   |
| $\beta$ /°                                          | 106.502(8)                                                                    |
| Volume /Å <sup>3</sup>                              | 1803.3(2)                                                                     |
| Z                                                   | 4                                                                             |
| Density $\rho_{\text{calc}}$ /g cm <sup>-3</sup>    | 1.666                                                                         |
| $\mu$ /cm <sup>-1</sup>                             | 2.575                                                                         |
| <i>F</i> (000)                                      | 912.00                                                                        |
| <i>T</i> /K                                         | 296.15                                                                        |
| No. of refractions measured                         | 16479                                                                         |
| No. of refractions used ( <i>R</i> <sub>int</sub> ) | 4116 (0.0373)                                                                 |
| R1, wR2                                             | 0.0408, 0.0482                                                                |
| Goodness of fit on <i>F</i> <sup>2</sup>            | 1.086                                                                         |
| $\rho_{\text{fin}}$ (max/min) /e Å <sup>3</sup>     | 0.26/-0.34                                                                    |

**Table S2.** Photophysical properties of **TPB-1–4** in different solvents<sup>a</sup>

| Dye                             | Solvent                         | $\lambda_{\text{abs}} / \text{nm}$ ( $\epsilon / 10^2 \text{M}^{-1} \text{cm}^{-1}$ ) | $\lambda_{\text{em}} / \text{nm}$ | $\Phi_{\text{PL}}$ |
|---------------------------------|---------------------------------|---------------------------------------------------------------------------------------|-----------------------------------|--------------------|
| <b>TPB-1</b>                    | CHCl <sub>3</sub>               | 419 (270)                                                                             | 543                               | 0.055              |
|                                 | CH <sub>2</sub> Cl <sub>2</sub> | 423 (250)                                                                             | 561                               | 0.022              |
|                                 | THF                             | 439 (283)                                                                             | N.D. <sup>b</sup>                 | N.D. <sup>b</sup>  |
|                                 | acetone                         | 427 (271)                                                                             | N.D. <sup>b</sup>                 | N.D. <sup>b</sup>  |
|                                 | DMSO                            | 426 (241)                                                                             | N.D. <sup>b</sup>                 | N.D. <sup>b</sup>  |
|                                 | DMF                             | 423 (239)                                                                             | N.D. <sup>b</sup>                 | N.D. <sup>b</sup>  |
|                                 | <b>TPB-2</b>                    | CHCl <sub>3</sub>                                                                     | 347 (176), 424 (82)               | 593                |
| CH <sub>2</sub> Cl <sub>2</sub> |                                 | 345 (158), 429 (75)                                                                   | 618                               | 0.003              |
| THF                             |                                 | 337 (156), 452 (89)                                                                   | N.D. <sup>b</sup>                 | N.D. <sup>b</sup>  |
| acetone                         |                                 | 337 (174), 439 (84)                                                                   | N.D. <sup>b</sup>                 | N.D. <sup>b</sup>  |
| DMSO                            |                                 | 346 (168), 433 (71)                                                                   | N.D. <sup>b</sup>                 | N.D. <sup>b</sup>  |
| DMF                             |                                 | 344 (183), 425 (75)                                                                   | N.D. <sup>b</sup>                 | N.D. <sup>b</sup>  |
| <b>TPB-3</b>                    |                                 | CHCl <sub>3</sub>                                                                     | 409 (300), 433 (270)              | 475                |
|                                 | CH <sub>2</sub> Cl <sub>2</sub> | 408 (300)                                                                             | 476                               | 0.39               |
|                                 | THF                             | 409 (273)                                                                             | 518                               | 0.017              |
|                                 | acetone                         | 404 (288)                                                                             | 516                               | 0.010              |
|                                 | DMSO                            | 406 (242)                                                                             | 503                               | 0.004              |
|                                 | DMF                             | 405 (237)                                                                             | 493                               | 0.004              |
|                                 | <b>TPB-4</b>                    | CHCl <sub>3</sub>                                                                     | 425 (364), 448 (319)              | 491                |
| CH <sub>2</sub> Cl <sub>2</sub> |                                 | 423 (358)                                                                             | 498                               | 0.16               |
| THF                             |                                 | 424 (351)                                                                             | 536                               | 0.014              |
| acetone                         |                                 | 419 (334)                                                                             | 537                               | 0.009              |
| DMSO                            |                                 | 420 (289)                                                                             | 518                               | 0.010              |
| DMF                             |                                 | 420 (264)                                                                             | 509                               | 0.003              |

<sup>a</sup> Measured at rt. <sup>b</sup> Not determined due to too weak emission.

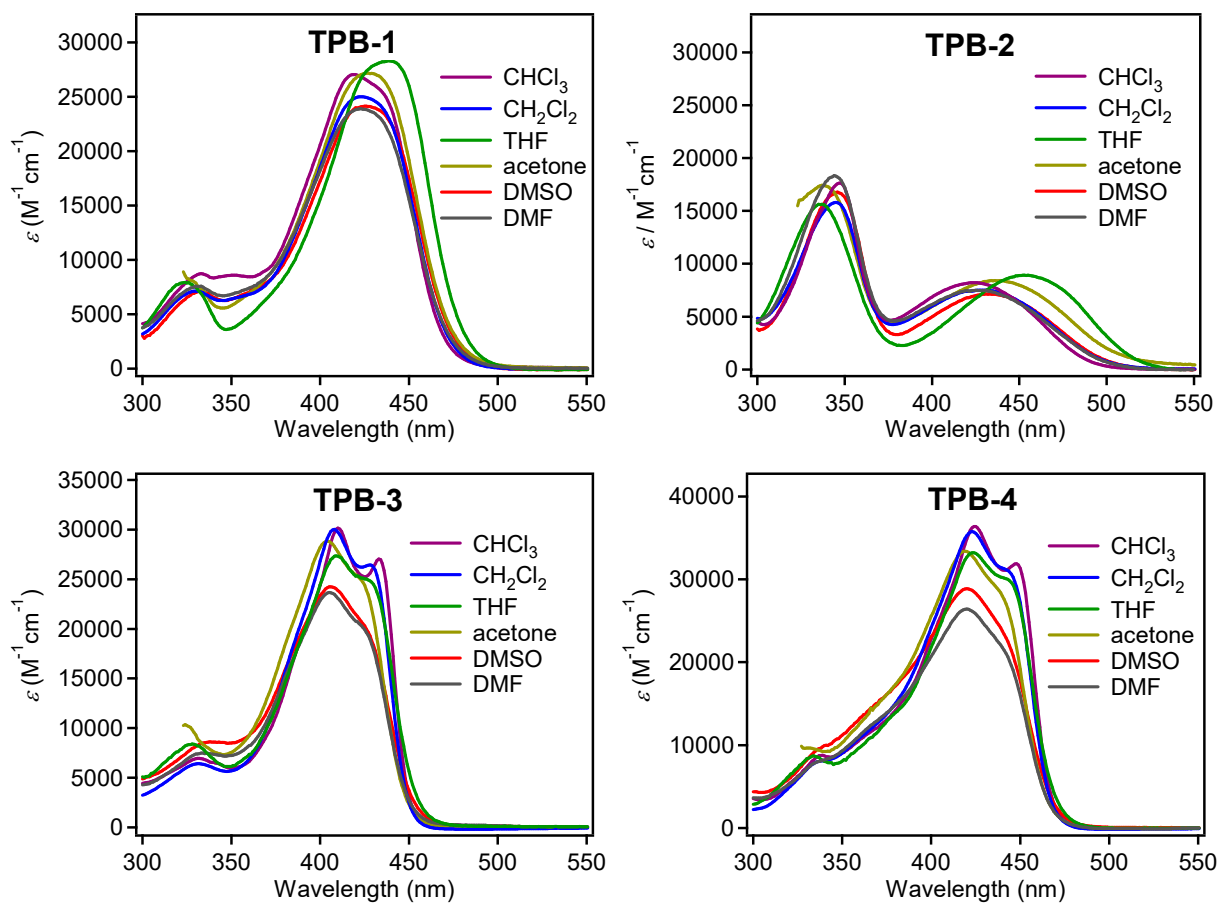

**Fig. S1.** Electronic absorption spectra of TPB-1–4 in different solvents ( $1.0 \times 10^{-5}$  M).

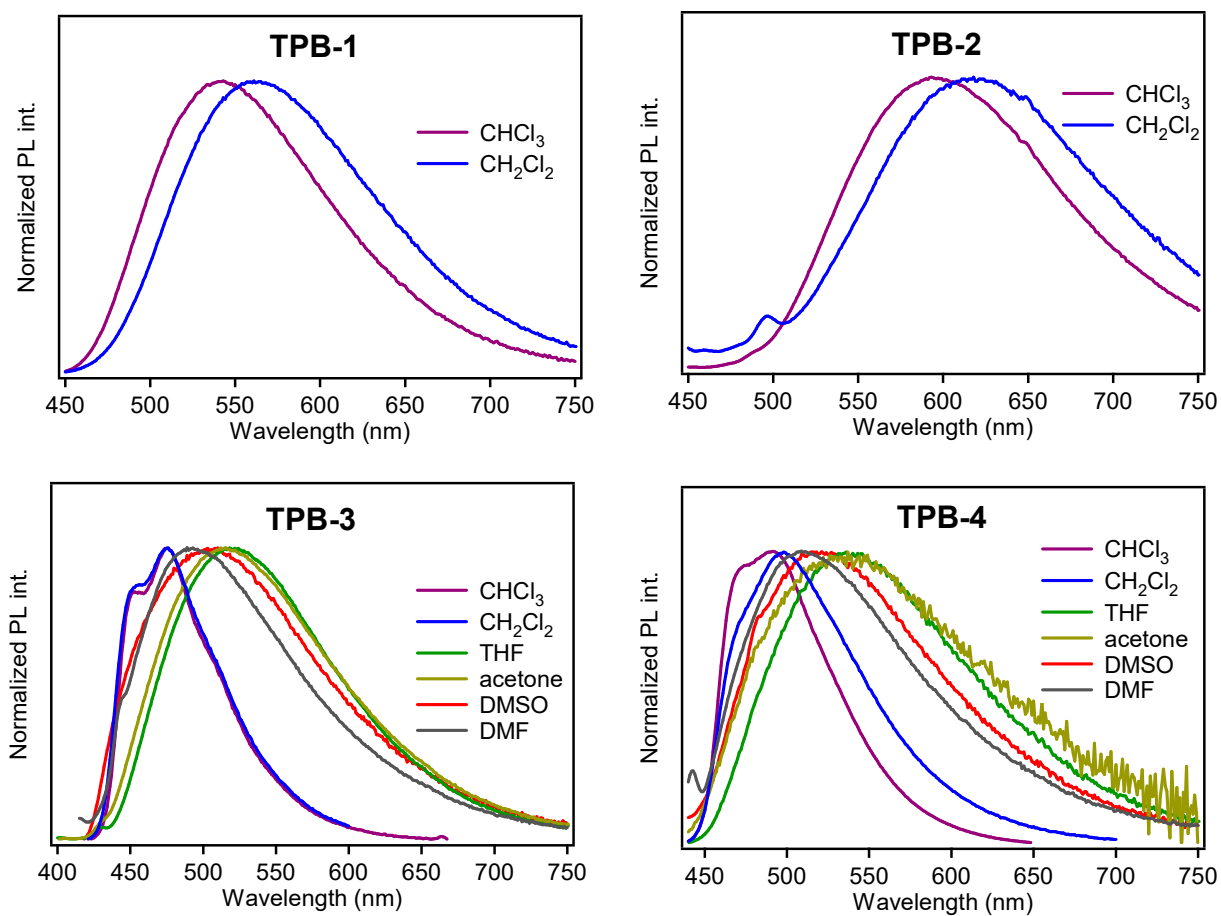

**Fig. S2.** Fluorescence spectra of TPB-1–4 in different solvents ( $1.0 \times 10^{-5}$  M).

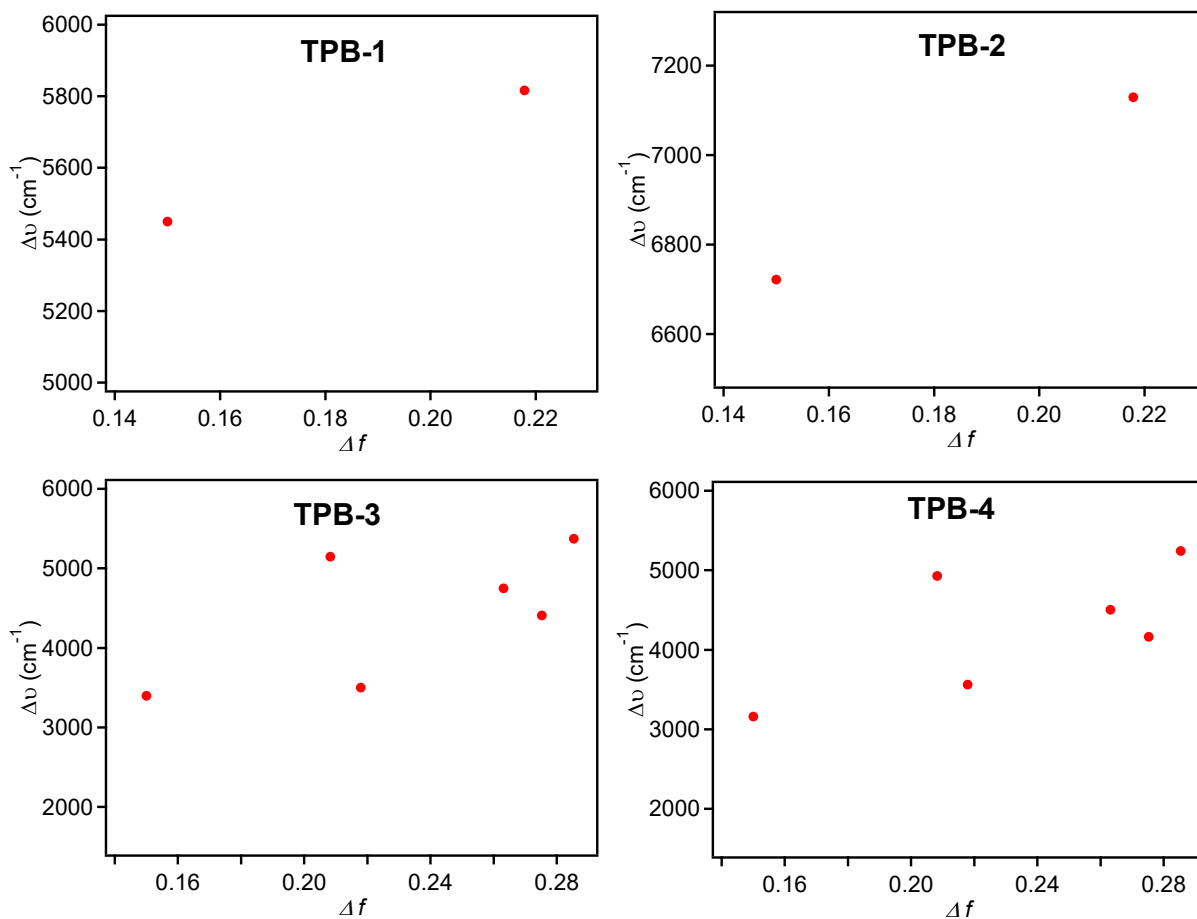

**Fig. S3.** Lippert-Mataga plots for TPB-1-4.

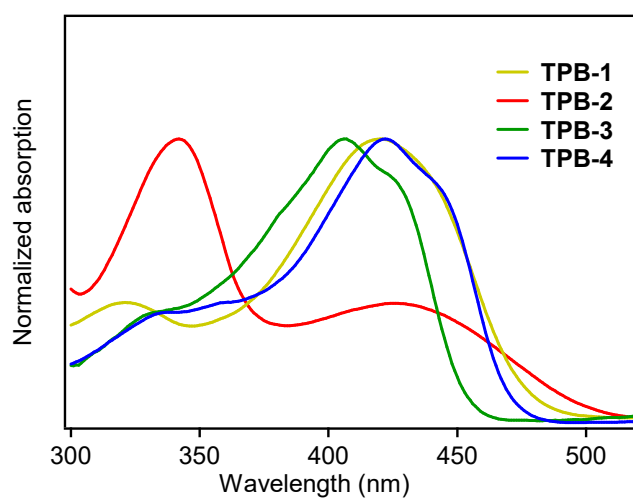

**Fig. S4.** Electronic absorption spectra of TPB-1-4 in PMMA doped film.

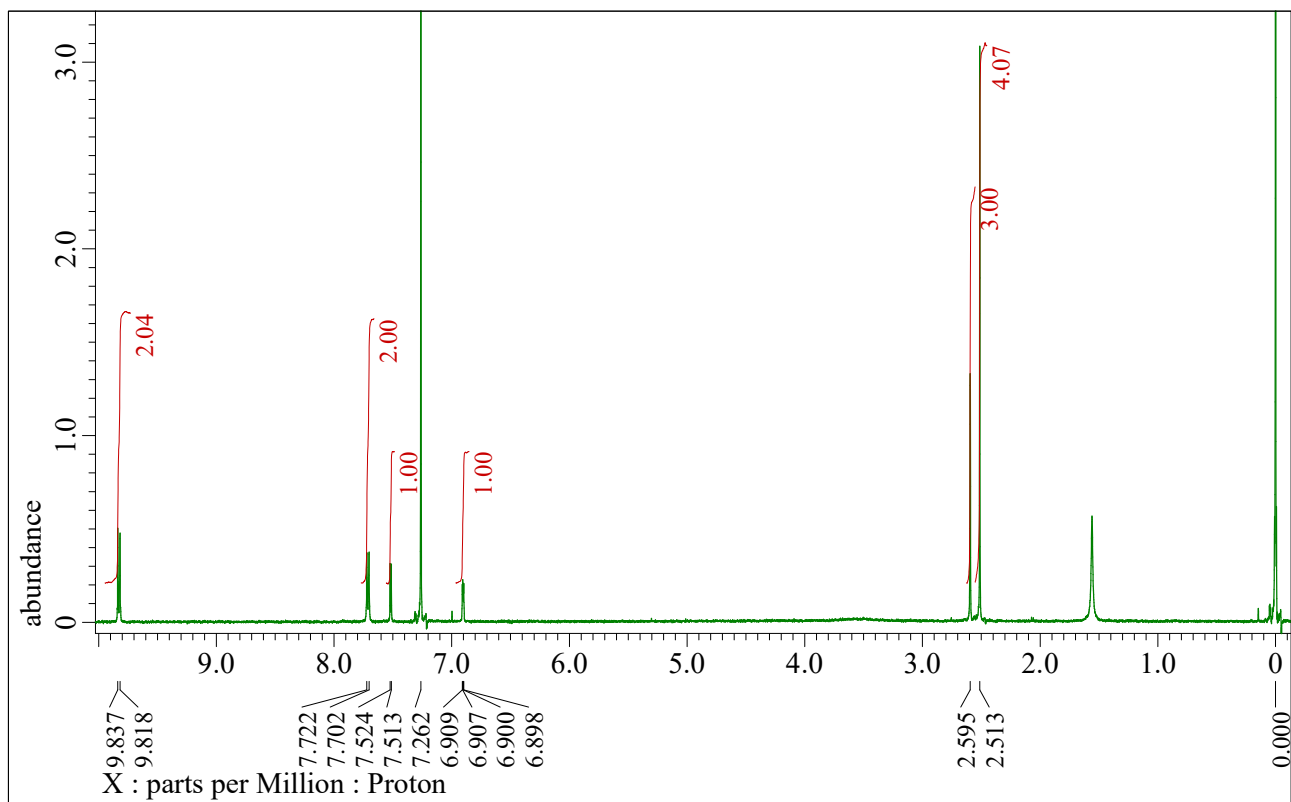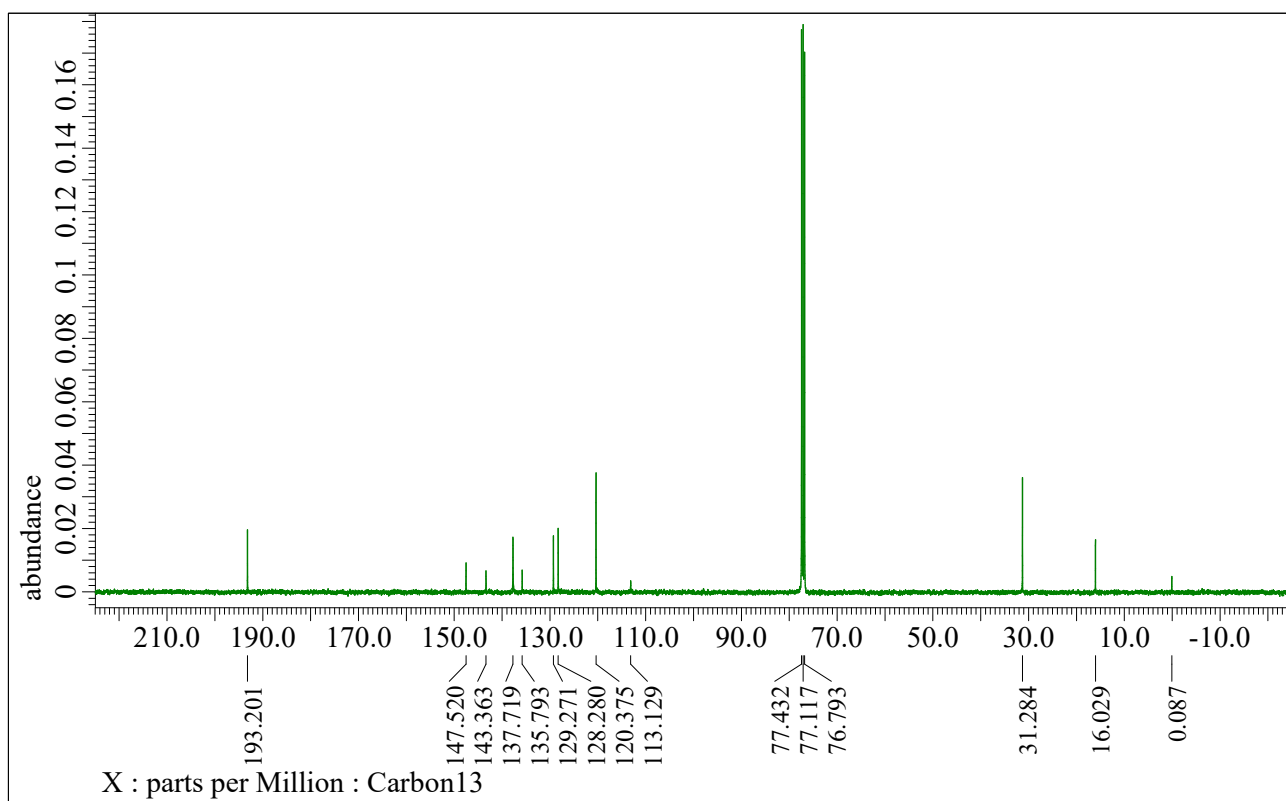

**Fig. S5.** <sup>1</sup>H (upper, 400 MHz) and <sup>13</sup>C (lower, 100 MHz) spectra of TPB-1 (CDCl<sub>3</sub>, 25 °C).



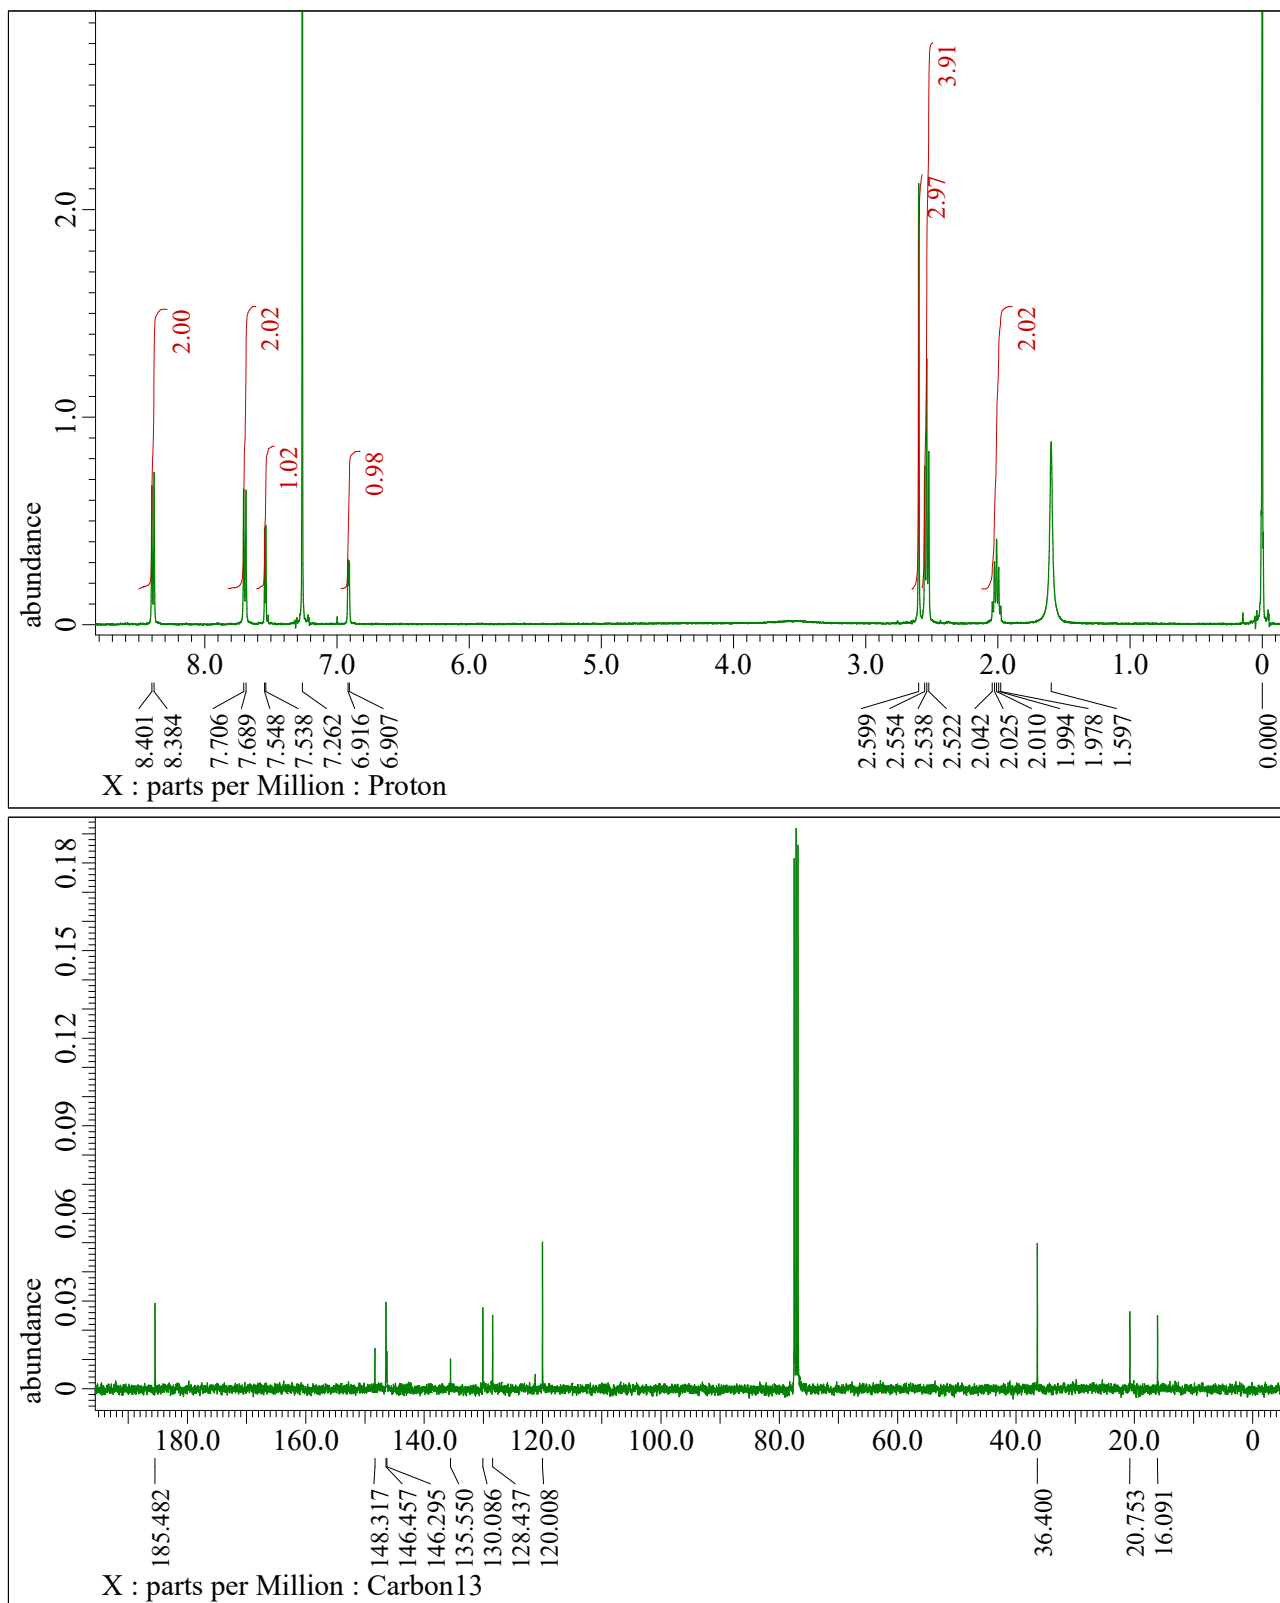

**Fig. S6.**  $^1\text{H}$  (upper, 400 MHz) and  $^{13}\text{C}$  (lower, 100 MHz) spectra of **TPB-2** ( $\text{CDCl}_3$ , 25  $^\circ\text{C}$ ).

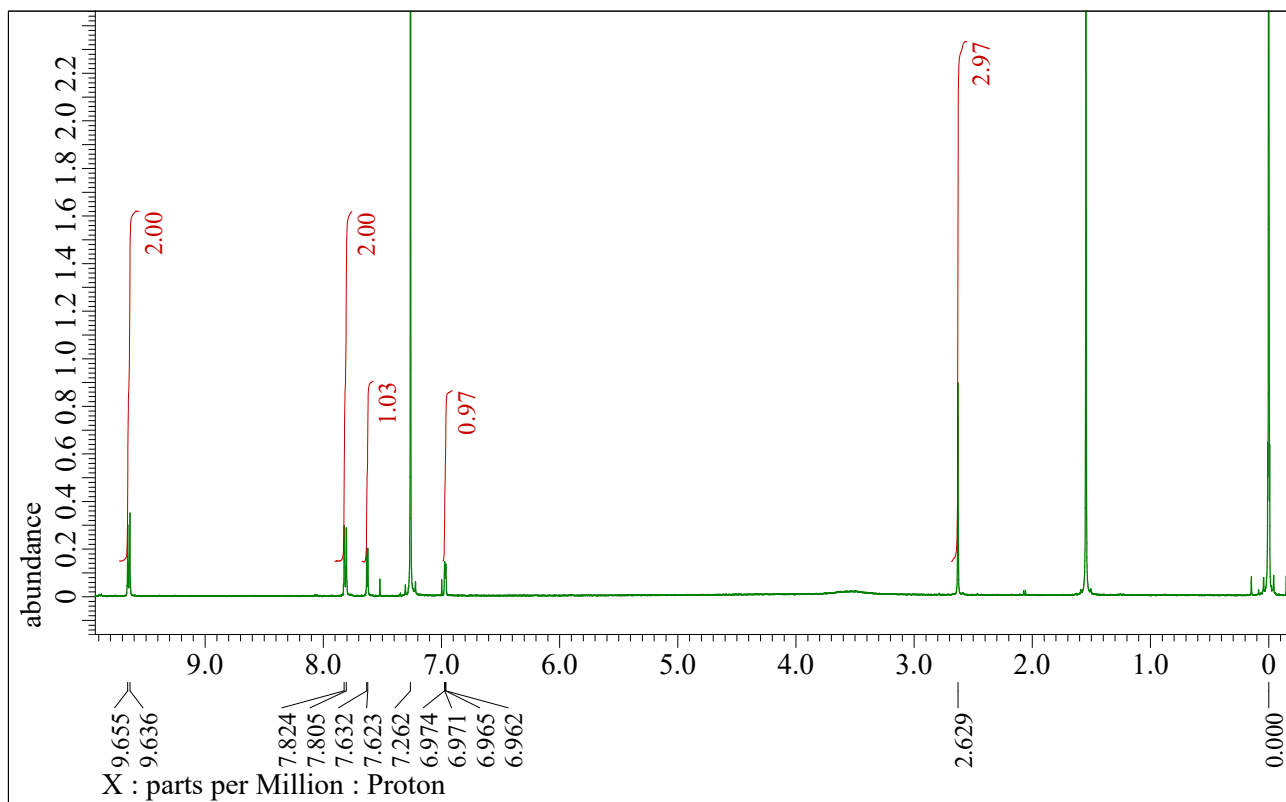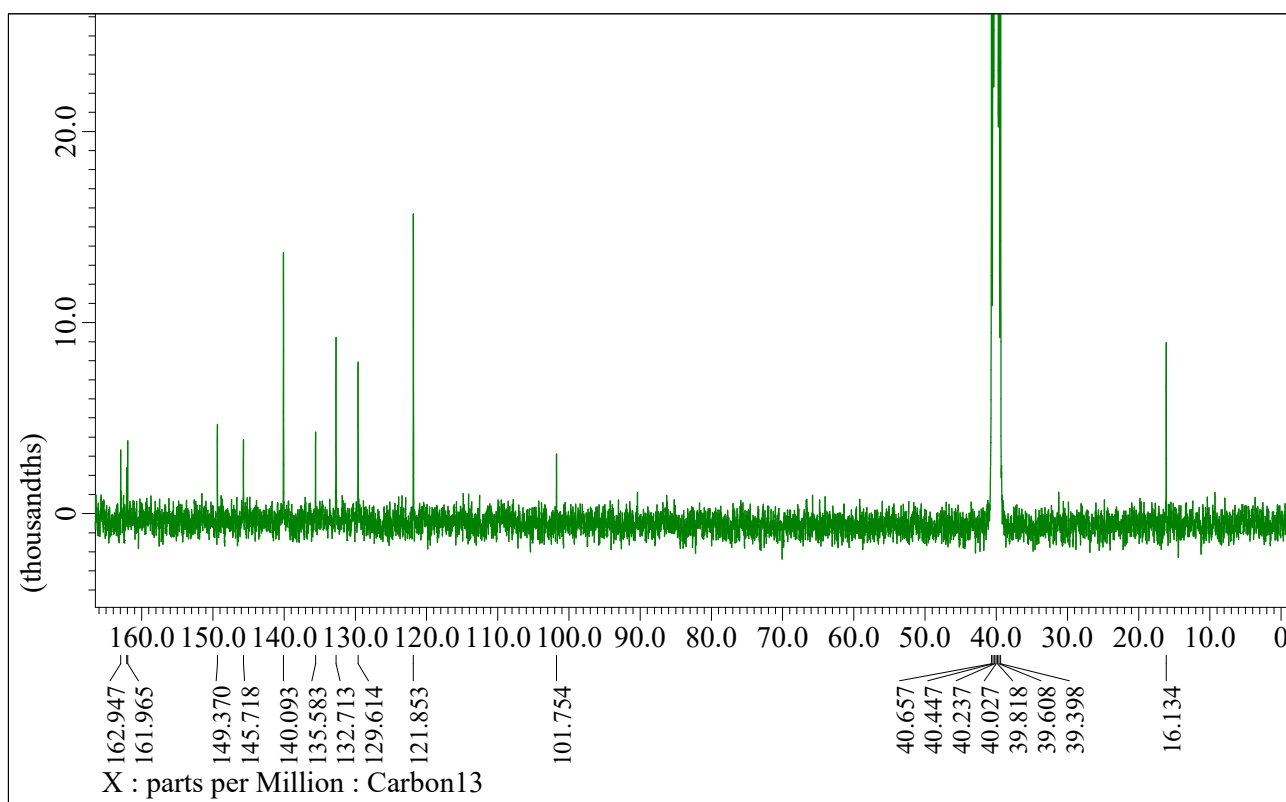

**Fig. S7.** <sup>1</sup>H (upper, 400 MHz, CDCl<sub>3</sub>) and <sup>13</sup>C (lower, 100 MHz, DMSO-D<sub>6</sub>) spectra of TPB-3 (25 °C).

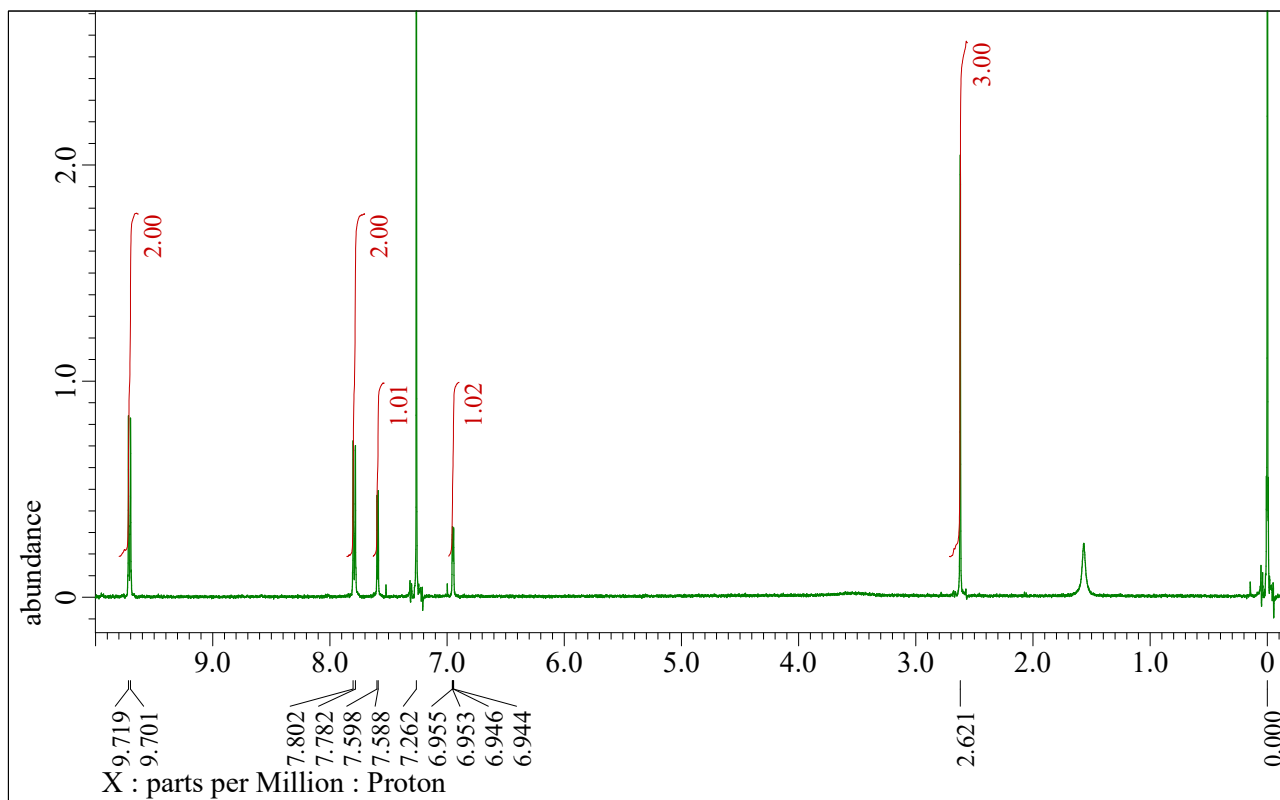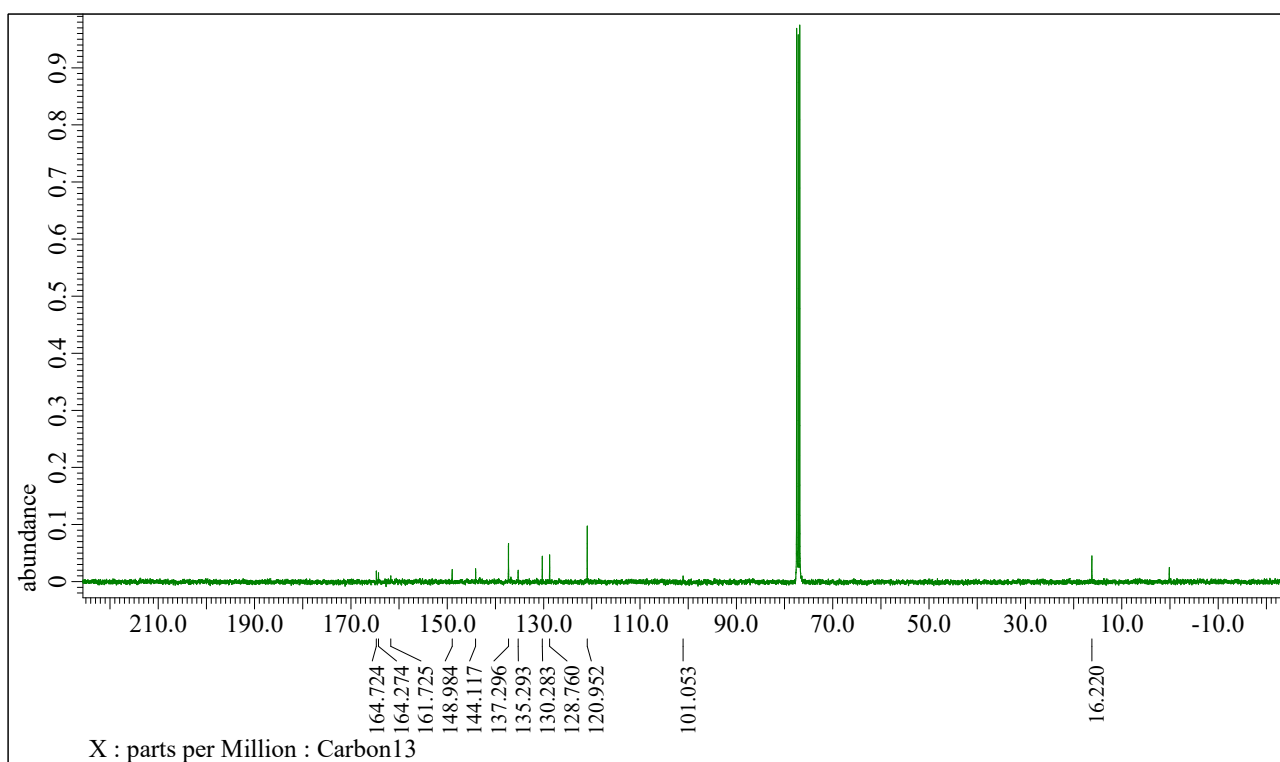

**Fig. S8.**  $^1\text{H}$  (upper, 400 MHz) and  $^{13}\text{C}$  (lower, 100 MHz) spectra of **TPB-4** ( $\text{CDCl}_3$ , 25 °C).

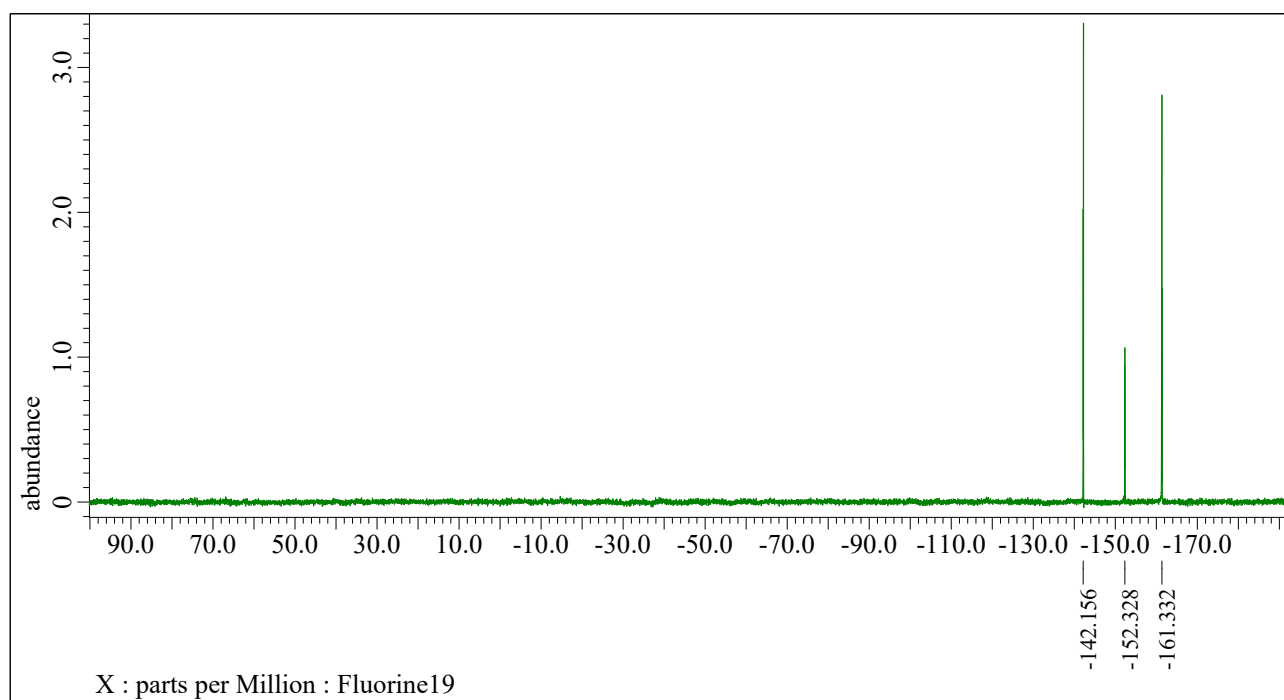

**Fig. S9.**  $^{19}\text{F}$  (376 MHz) spectra of **TPB-4** ( $\text{CDCl}_3$ ,  $25\text{ }^\circ\text{C}$ ).

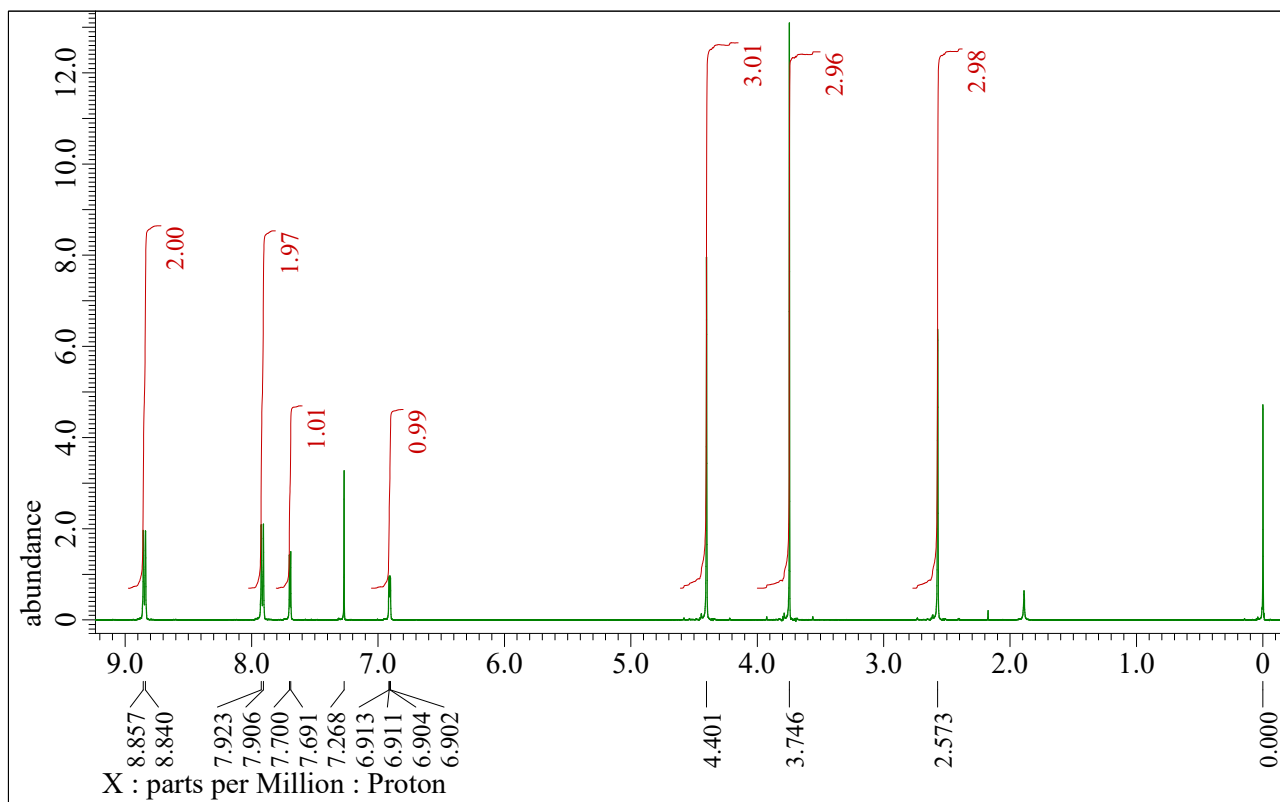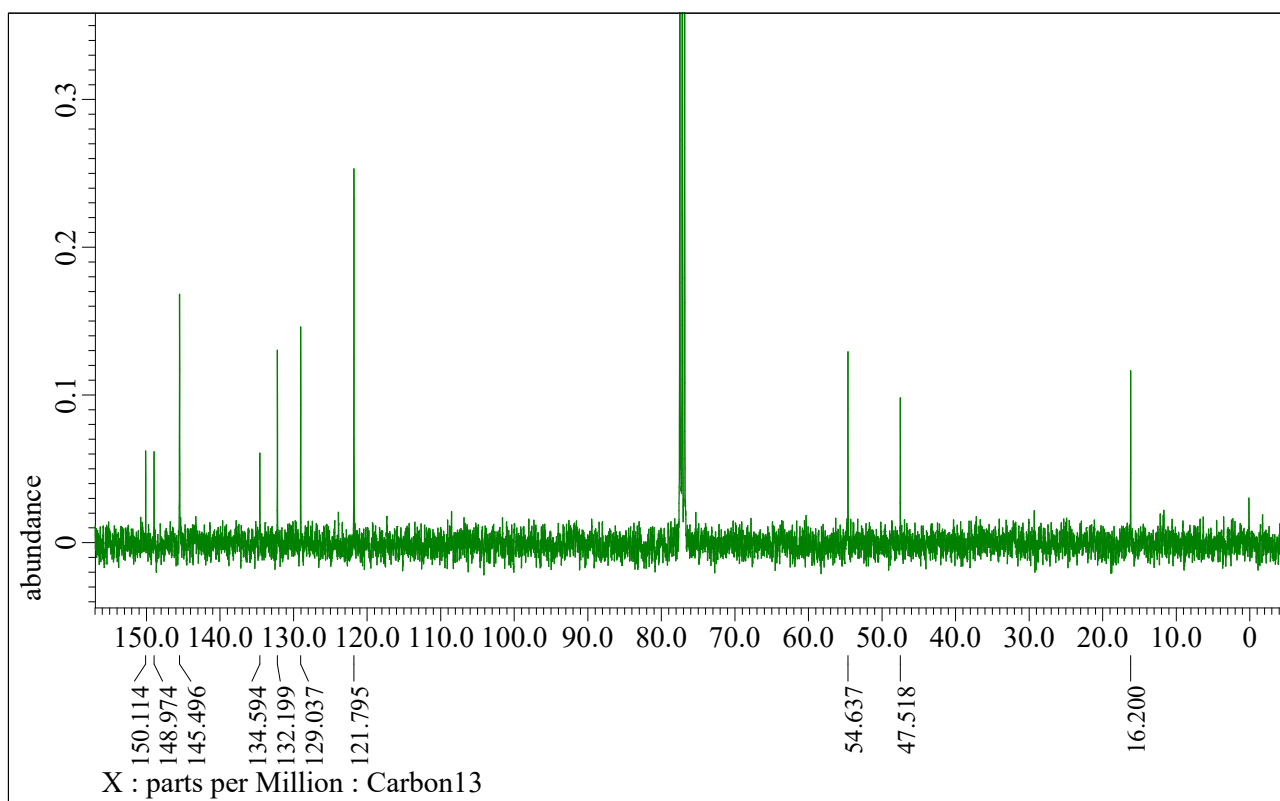

**Fig. S10.** <sup>1</sup>H (upper, 400 MHz) and <sup>13</sup>C (lower, 100 MHz) spectra of TP-Me (CDCl<sub>3</sub>, 25 °C).
